# Supplementary material
Source: MDPI journal article supplement (https://www.mdpi.com/2076-3417/14/8/3487)
Supplement: s1 [file s1]

*Review*

# **Selected Plants as Sources of Natural and Active Ingredients for Cosmetics of the Future**

**Sławomir Kowalczyk<sup>1,2</sup>, Mirosława Grymel<sup>2,3\*</sup>, Janusz Bilik<sup>1</sup>, Wiktoria Kula<sup>2</sup>, Agata Wawoczny<sup>2</sup>, Paulina Grymel<sup>4</sup> and Danuta Gillner<sup>2,3\*</sup>**

<sup>1</sup> Melaleuca Poland Ltd. Al. W. Korfantego 5/1, 44-100 Gliwice, Poland; slawomir.kowalczyk@melaleuca.com.pl (S.K.); januszantonibilik@gmail.com (J.B.)

<sup>2</sup> Department of Organic Chemistry, Bioorganic Chemistry and Biotechnology, Silesian University of Technology, B. Krzywoustego 4, 44-100 Gliwice, Poland; wiktul470@student.polsl.pl (W.K.)

<sup>3</sup> Biotechnology Center, Silesian University of Technology, B. Krzywoustego 8, 44-100 Gliwice, Poland

<sup>4</sup> Academy of Fine Arts and Design, Koszarowa 19, 40-074 Katowice, Poland

\* Correspondence: danuta.gillner@polsl.pl (D.G.); Tel.: +48 032-237-26-19; fax: +48 032-237-2094; mirosława.grymel@polsl.pl (M.G.); Tel.: +48 032-237-18-73; fax: +48 032-237-2094

**Table S1.** Plant species and the countries list where the plants are found.

| <b>Plant</b>                | <b>Native to</b>                                                                                                                                                                                                                                                                                                                                                                                                                                                                                                                                                                                                                                                                                                                                                                                                                                                                                                                                                                                                                                                                                                                                                                            | <b>Introduced into</b>                                                                                                                                                                                                                                                                |
|-----------------------------|---------------------------------------------------------------------------------------------------------------------------------------------------------------------------------------------------------------------------------------------------------------------------------------------------------------------------------------------------------------------------------------------------------------------------------------------------------------------------------------------------------------------------------------------------------------------------------------------------------------------------------------------------------------------------------------------------------------------------------------------------------------------------------------------------------------------------------------------------------------------------------------------------------------------------------------------------------------------------------------------------------------------------------------------------------------------------------------------------------------------------------------------------------------------------------------------|---------------------------------------------------------------------------------------------------------------------------------------------------------------------------------------------------------------------------------------------------------------------------------------|
| <i>Acemella oleracea</i>    | Brazil Southeast                                                                                                                                                                                                                                                                                                                                                                                                                                                                                                                                                                                                                                                                                                                                                                                                                                                                                                                                                                                                                                                                                                                                                                            | Assam, Bangladesh, Benin, Bolivia, Brazil North, Brazil Northeast, Brazil South, Central African Republic, Colombia, Comoros, Cuba, Ecuador, Gabon, Guinea, India, Jawa, Leeward Is., Mali, Mauritius, Myanmar, Nepal, Peru, Réunion, Sri Lanka, Taiwan, Vietnam, Windward Is., Zaïre |
| <i>Centella asiatica</i>    | Andaman Is., Angola, Assam, Bangladesh, Benin, Bismarck Archipelago, Borneo, Botswana, Burkina, Burundi, Cabinda, Cambodia, Cameroon, Cape Provinces, Cape Verde, Caprivi Strip, Caroline Is., Central African Republic, Chad, China North-Central, China South-Central, China Southeast, Comoros, Congo, East Himalaya, Equatorial Guinea, Eritrea, Ethiopia, Fiji, Free State, Gabon, Gambia, Ghana, Guinea, Guinea-Bissau, Gulf of Guinea Is., India, Iran, Ivory Coast, Japan, Jawa, Kenya, Korea, KwaZulu-Natal, Laos, Lesotho, Lesser Sunda Is., Liberia, Madagascar, Malawi, Malaya, Mali, Maluku, Marianas, Marshall Is., Mauritania, Mauritius, Mozambique, Myanmar, Namibia, Nansei-shoto, Nepal, New Caledonia, New Guinea, New South Wales, Nicobar Is., Niger, Nigeria, Northern Provinces, Northern Territory, Ogasawara-shoto, Pakistan, Philippines, Queensland, Rodrigues, Rwanda, Réunion, Samoa, Saudi Arabia, Senegal, Sierra Leone, Socotra, Solomon Is., Somalia, Sri Lanka, Sudan, Sulawesi, Sumatera, Swaziland, Taiwan, Tanzania, Thailand, Togo, Tonga, Transcaucasus, Uganda, Vanuatu, Vietnam, Wallis-Futuna Is., West Himalaya, Yemen, Zambia, Zaïre, Zimbabwe | Ascension, Chagos Archipelago, Colombia, Cook Is., Florida, Hawaii, Marquesas, New Zealand North, Niue, Norfolk Is., Oregon, Seychelles, Society Is., St.Helena, Tristan da Cunha, Tubuai Is.                                                                                         |
| <i>Psoralea corylifolia</i> | Assam, Bangladesh, China South-Central, Djibouti, India, Iraq, Jawa, Laos, Malaya, Myanmar, Oman, Pakistan, Somalia, Sri Lanka, Vietnam, West Himalaya, Yemen                                                                                                                                                                                                                                                                                                                                                                                                                                                                                                                                                                                                                                                                                                                                                                                                                                                                                                                                                                                                                               | Mauritius, Réunion                                                                                                                                                                                                                                                                    |
| <i>Plantago lanceolata</i>  | Afghanistan, Albania, Algeria, Austria, Azores, Balears, Baltic States, Belarus, Belgium, Bosnia and Herzegovina, Bulgaria, Canary Is., Central European Russia, China North-Central, China South-Central, China Southeast, Corse, Croatia, Cyprus, Czech Republic, Denmark, East Aegean Is., East European Russia, East Himalaya, Finland, France, Føroyar, Germany, Great Britain, Greece, Hungary, Iceland, Inner Mongolia, Iran, Iraq, Ireland, Italy, Kazakhstan,                                                                                                                                                                                                                                                                                                                                                                                                                                                                                                                                                                                                                                                                                                                      | Alabama, Alaska, Altay, Amsterdam-St.Paul Is, Argentina Northeast, Argentina Northwest, Argentina South, Arizona, Arkansas, Ascension, Bahamas, Bermuda, Bolivia, Botswana, Brazil South, Brazil Southeast, British Columbia, California, Cape Provinces, Chile Central, Chile        |

|                           |                                                                                                                                                                                                                                                                                                                                                                                                                                                                                                                                           |                                                                                                                                                                                                                                                                                                                                                                                                                                                                                                                                                                                                                                                                                                                                                                                                                                                                                                                                                                                                                                                                                                                                                                                                                                                                                                                                                                                              |
|---------------------------|-------------------------------------------------------------------------------------------------------------------------------------------------------------------------------------------------------------------------------------------------------------------------------------------------------------------------------------------------------------------------------------------------------------------------------------------------------------------------------------------------------------------------------------------|----------------------------------------------------------------------------------------------------------------------------------------------------------------------------------------------------------------------------------------------------------------------------------------------------------------------------------------------------------------------------------------------------------------------------------------------------------------------------------------------------------------------------------------------------------------------------------------------------------------------------------------------------------------------------------------------------------------------------------------------------------------------------------------------------------------------------------------------------------------------------------------------------------------------------------------------------------------------------------------------------------------------------------------------------------------------------------------------------------------------------------------------------------------------------------------------------------------------------------------------------------------------------------------------------------------------------------------------------------------------------------------------|
|                           | <p>Kirgizstan, Kriti, Krym, Kuwait, Lebanon-Syria, Libya, Macedonia, Madeira, Manchuria, Mauritania, Mongolia, Montenegro, Morocco, Nepal, Netherlands, North Caucasus, North European Russia, Norway, Pakistan, Palestine, Poland, Portugal, Romania, Sardegna, Saudi Arabia, Serbia, Sicilia, Slovak Republic, Slovenia, South European Russia, Spain, Sweden, Switzerland, Tadzhikistan, Taiwan, Transcaucasus, Tunisia, Turkey, Turkey-in-Europe, Turkmenistan, Ukraine, Uzbekistan, West Himalaya, West Siberia, Xinjiang, Yemen</p> | <p>North, Chile South, Colombia, Colorado, Connecticut, Cook Is., Costa Rica, Crozet Is., Cuba, Delaware, Desventurados Is., District of Columbia, Djibouti, Dominican Republic, Easter Is., Ecuador, Egypt, Eritrea, Ethiopia, Falkland Is., Florida, Free State, French Guiana, Gabon, Georgia, Greenland, Haiti, Hawaii, Idaho, Illinois, Indiana, Iowa, Jamaica, Japan, Juan Fernández Is., Kamchatka, Kansas, Kentucky, Kenya, Kerguelen, Khabarovsk, Korea, Krasnoyarsk, Kuril Is., KwaZulu-Natal, Leeward Is., Lesotho, Louisiana, Magadan, Maine, Malawi, Marion-Prince Edward, Maryland, Massachusetts, Mexico Northeast, Mexico Northwest, Mexico Southwest, Michigan, Minnesota, Mississippi, Missouri, Montana, Namibia, Nebraska, Nevada, New Brunswick, New Caledonia, New Hampshire, New Jersey, New Mexico, New York, New Zealand North, Newfoundland, Niue, Norfolk Is., North Carolina, North Dakota, Northern Provinces, Nova Scotia, Ohio, Oklahoma, Ontario, Oregon, Panamá, Pennsylvania, Peru, Primorye, Prince Edward I., Puerto Rico, Québec, Rhode I., Rwanda, Sakhalin, Society Is., South Carolina, South Dakota, Sri Lanka, St.Helena, Sudan, Tanzania, Tasmania, Tennessee, Texas, Tonga, Tristan da Cunha, Tuamotu, Tubuai Is., Uruguay, Utah, Venezuela, Vermont, Virginia, Washington, West Virginia, Windward Is., Wisconsin, Wyoming, Zaïre, Zimbabwe</p> |
| <i>Solidago virgaurea</i> | <p>Afghanistan, Albania, Algeria, Altay, Assam, Austria, Baltic States, Belarus, Belgium, Bosnia and Herzegovina, Bulgaria, Cambodia, Central European Russia, Corse, Croatia, Czech Republic, Denmark, East Aegean Is., East European Russia, East Himalaya, Finland, France, Germany, Great Britain,</p>                                                                                                                                                                                                                                | <p>Queensland, Sakhalin</p>                                                                                                                                                                                                                                                                                                                                                                                                                                                                                                                                                                                                                                                                                                                                                                                                                                                                                                                                                                                                                                                                                                                                                                                                                                                                                                                                                                  |

---

Greece, Hungary, Iran, Ireland, Italy, Japan, Krasnoyarsk, Krym, Kuril Is.,  
Lebanon-Syria, Macedonia, Mongolia, Montenegro, Morocco, Nepal,  
Netherlands, North Caucasus, North European Russia, Norway, Pakistan,  
Palestine, Philippines, Poland, Portugal, Romania, Sardegna, Serbia, Slovak  
Republic, Slovenia, South European Russia, Spain, Sweden, Switzerland,  
Transcaucasus, Tunisia, Turkey, Turkey-in-Europe, Ukraine, Vietnam, West  
Himalaya, West Siberia

---

Table prepared based on the <https://powo.science.kew.org/>, access: 11.04.2024.
